# Supplementary figures and images for: Favourable changes in mortality in people with diabetes: US NHANES 1999–2010
Source: PubMed Central journal article supplement — Diabetes Obes Metab. 2017 Jul 27;20(1):85–93. doi: 10.1111/dom.13039 (PMC5724499; doi:10.1111/dom.13039), 2017-07-27

### A. Death from any cause

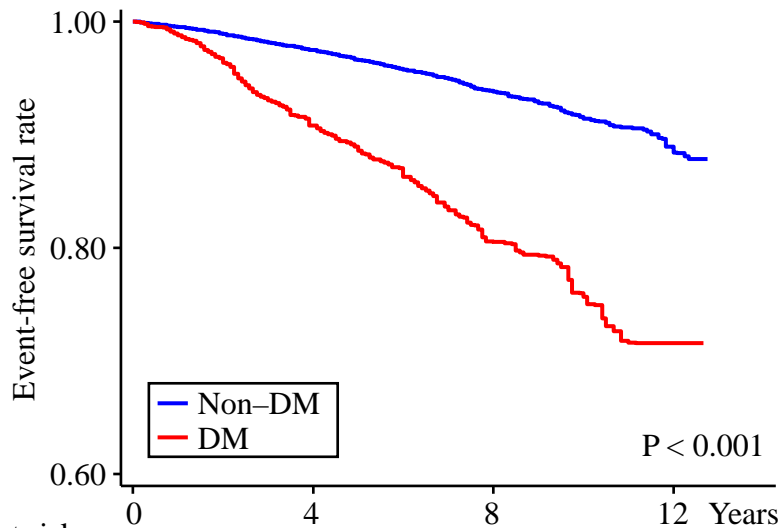

### B. Cardiovascular death

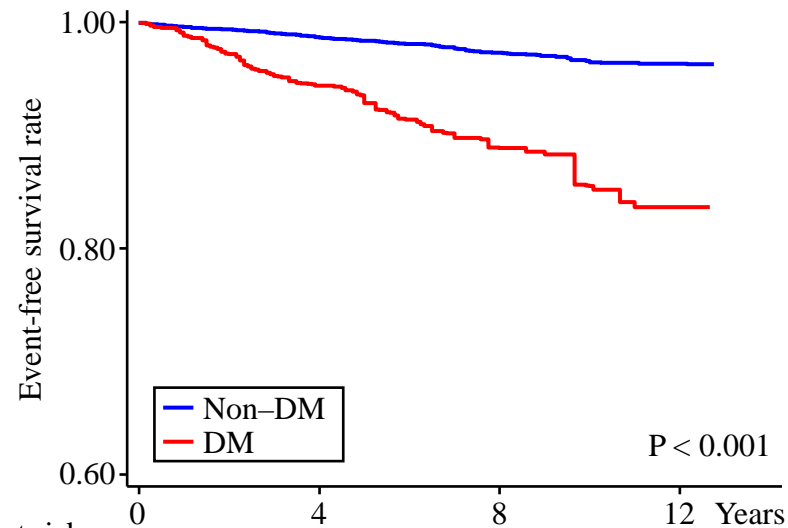

### C. Cardiac death

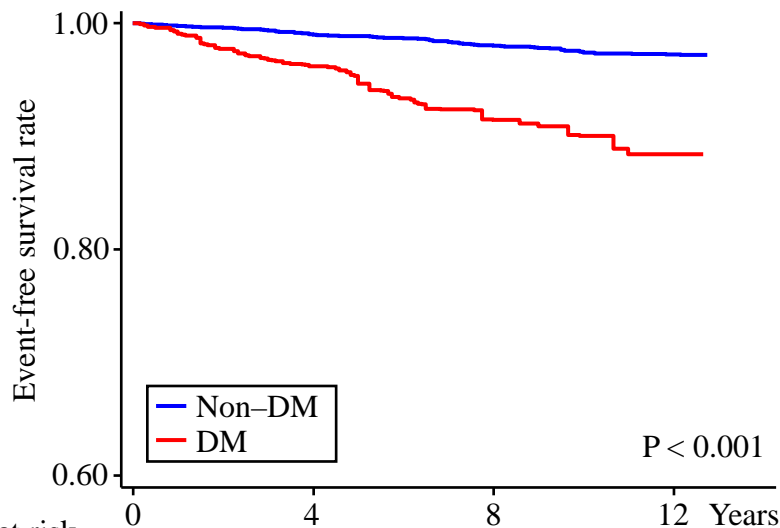

### D. Cancer death

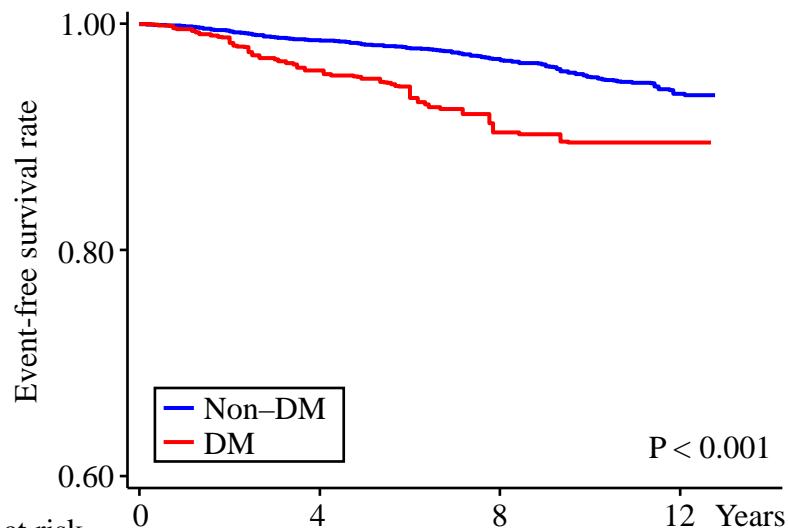

Supplement: DOM-20-85-s001.pdf [file DOM-20-85-s001.pdf]

**Fig. S2**

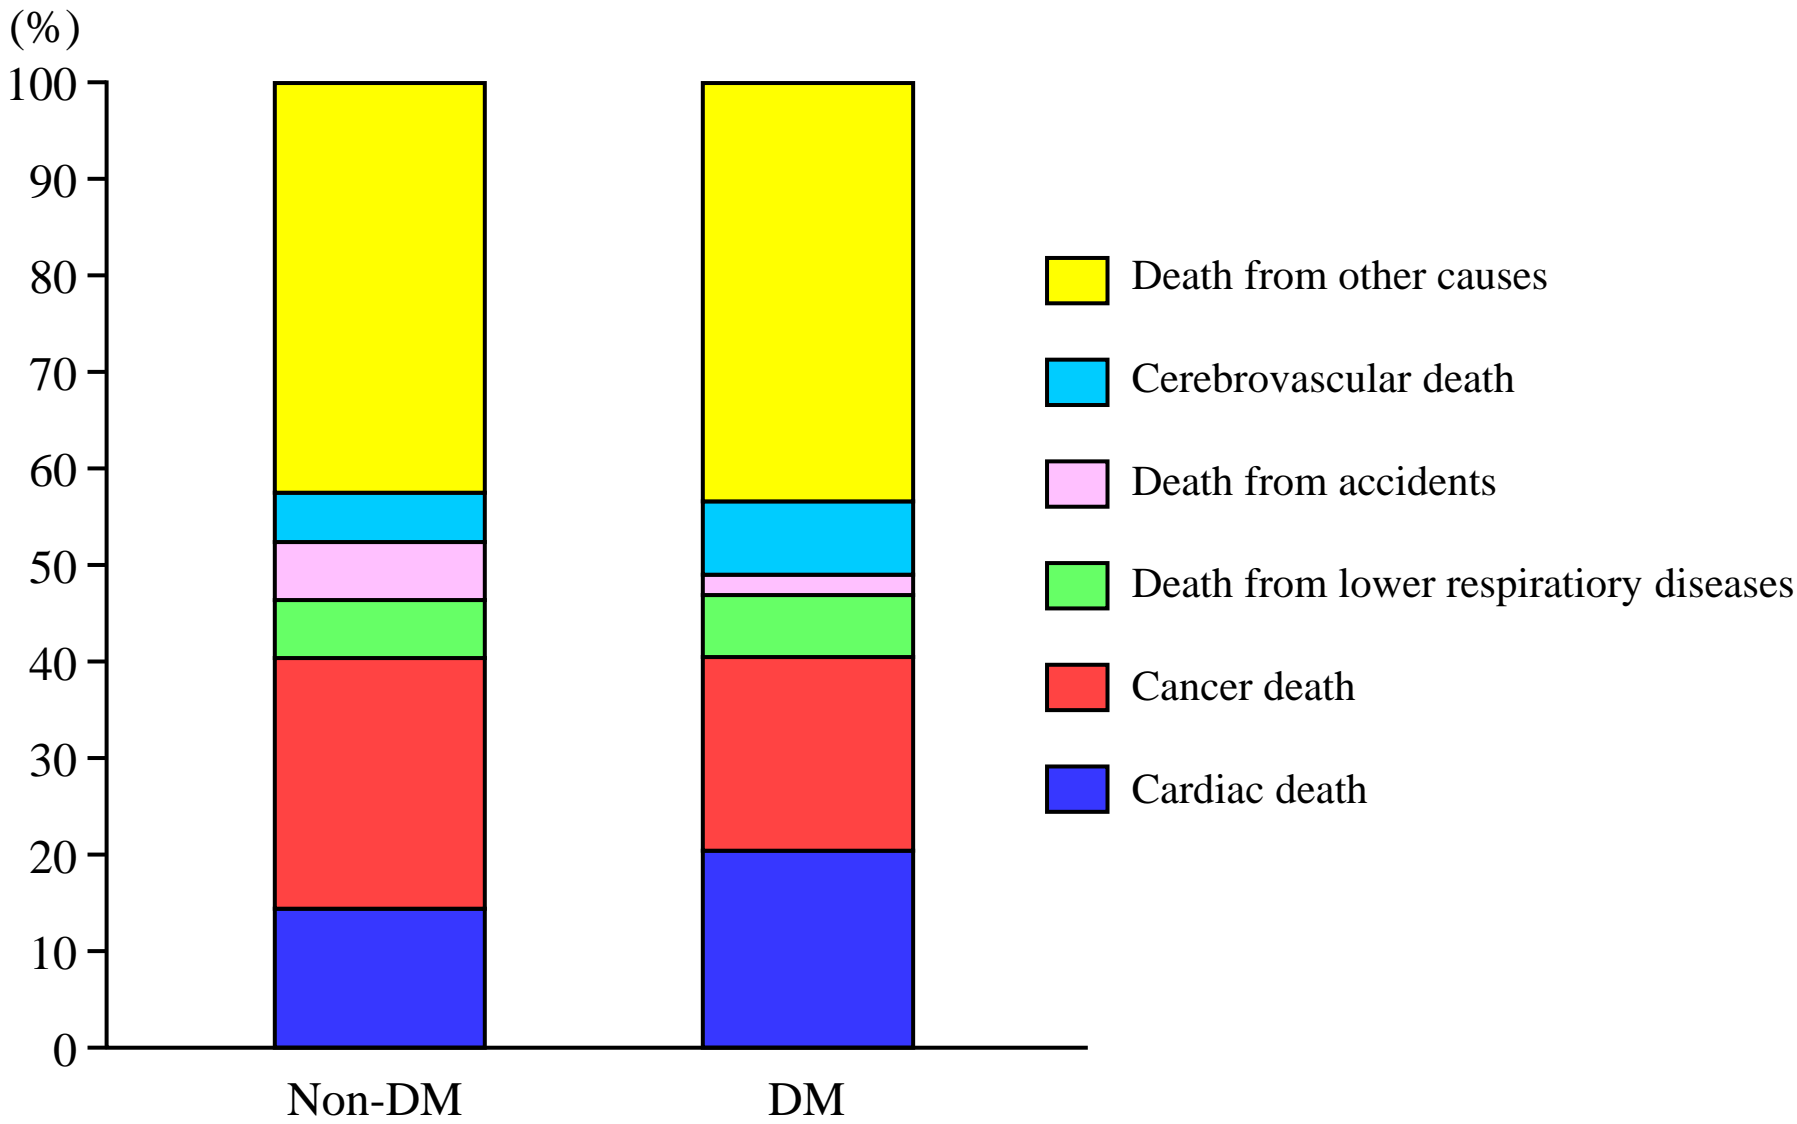

Supplement: DOM-20-85-s003.pdf [file DOM-20-85-s003.pdf]
